# Supplementary material for: New Polymers In Silico Generation and Properties Prediction
Source: MDPI journal article supplement (doi:10.3390/nanomanufacturing4010001), 2023-12-19
Supplement: s1 [file s1]

# New Polymers In Silico Generation and Properties Prediction

Andrey A. Knizhnik <sup>1,2</sup>, Pavel V. Komarov <sup>3,4,\*</sup>, Boris V. Potapkin <sup>1,2</sup>, Denis B. Shirabaykin <sup>1</sup>, Alexander S. Sinita <sup>1,2</sup> and Sergey V. Trepalin <sup>1,5</sup>

<sup>1</sup> Kintech Lab Ltd., 3rd Khoroshevskaya Str. 12, Moscow, 123298 Moscow, Russia

<sup>2</sup> National Research Center "Kurchatov Institute", Akademika Kurchatova Sq., 1, 123182 Moscow, Russia

<sup>3</sup> Institute of Organoelement Compounds RAS, Vavilova St. 28, 119991 Moscow, Russia

<sup>4</sup> General Physics Department, Tver State University, Sadovy Str. 35, 170002 Tver, Russia

<sup>5</sup> All Russian Institute for Scientific and Technical Information RAS, Usievicha Str. 20, 125215 Moscow, Russia

\* Correspondence: pv\_komarov@mail.ru

Additional Figures and Tables mentioned in the main text of our article.

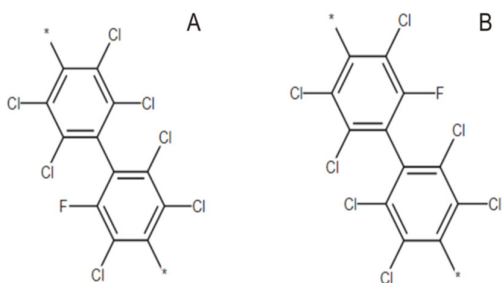

**Figure S1.** Identical structures for which different InChIkeys are generated (we tested the "winchi-1.exe" program included in the InChI 1.06 [48] distribution kit). The structure (A) InChIKey = BOJVIOJYDPQJAU-GDRMAEQFBA-N differs from structure (B) InChIKey = BOJVIOJYDPQJAU-SZAYNCSKBA-N by a 180-degree rotation in the plane.

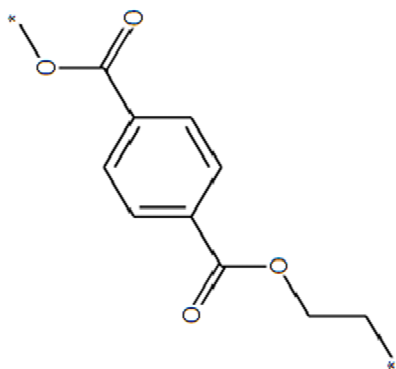

**Figure S2.** An example of the output of property prediction results for polyethylene terephthalate is shown in Table S1.

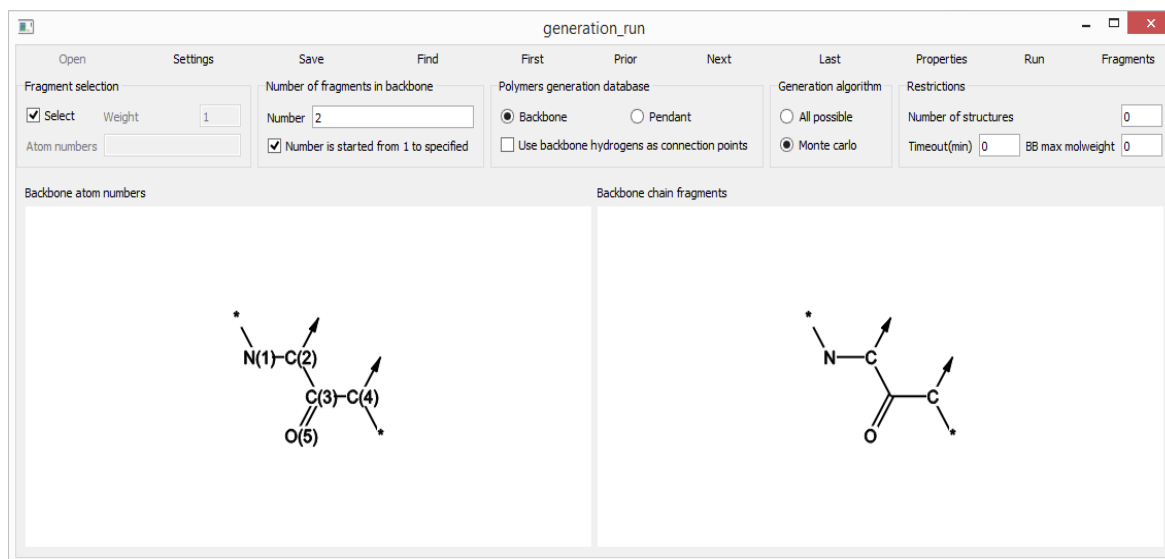

**Figure S3.** The graphical interface for setting initial conditions for the generation of structures. The isotopic labels of the compound in the database are interpreted as connecting points of pendant groups (arrows in the figure) and as flags of the backbone continuation (atoms to which asterisks are attached).

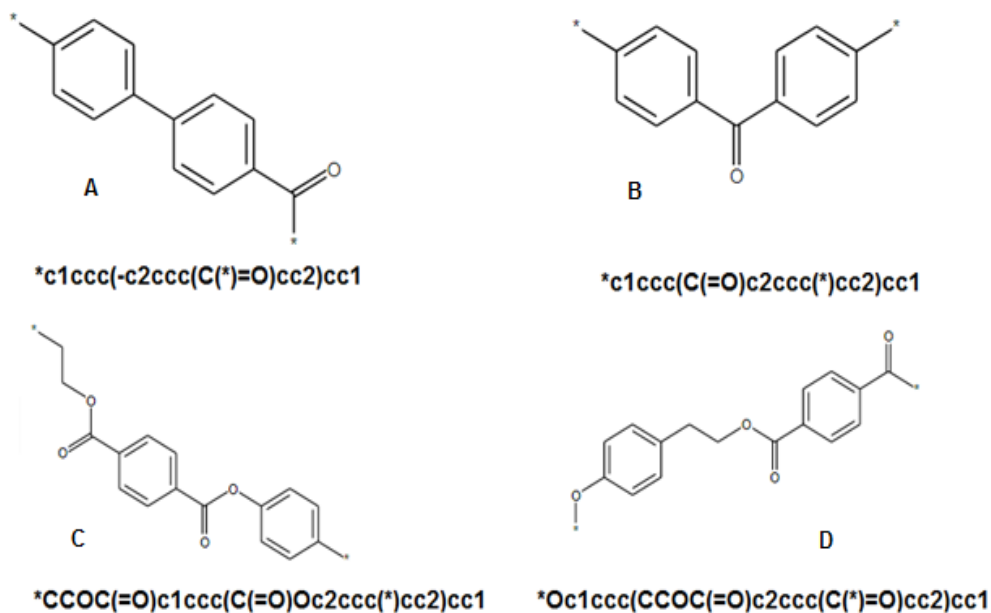

**Figure S4.** Example of duplicates in the PI1M database with the given SMILES notation. The pairs of structures (A, B) and (C, D) are identical. They differ in the choice of SRU, which is not unique.

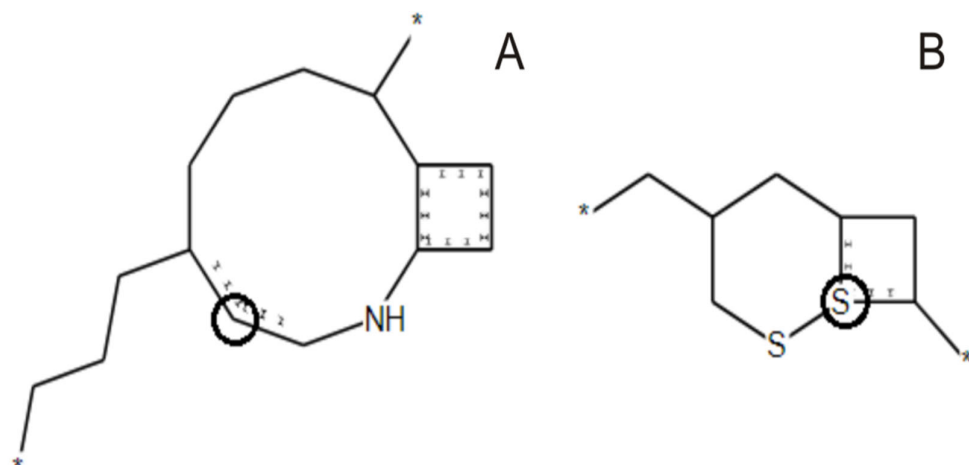

**Figure S5.** Examples of compounds (taken from PI1M) with aromatic cycles that do not clearly alternating for single and double bonds. One of the aromatic bonds on the circled atoms: (A) carbone, (B) sulfur must be single, and the other must be double. Because of the uncertainty, it is not possible to count the number of hydrogen atoms in neighboring atoms.

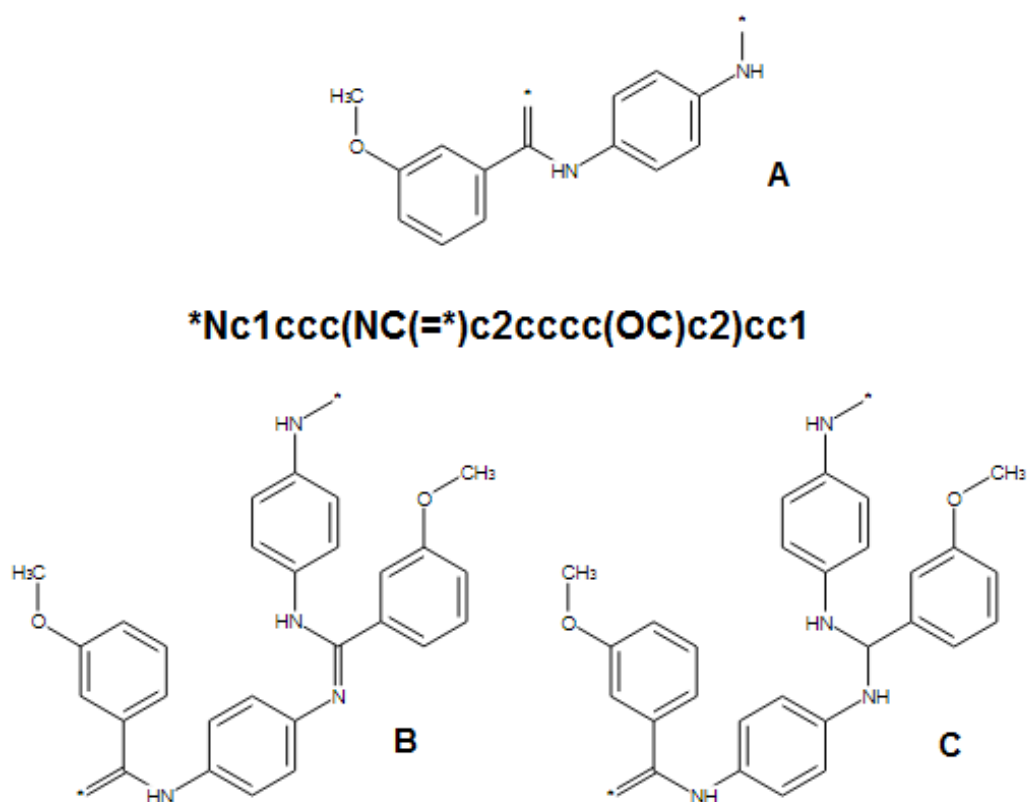

**Figure S6.** A repeating polymer fragment (A) and two possible dimers (B and C) that can be generated from fragment A. The dimers differ by the presence (B) and absence (C) of the double bond C=N/C-N.

**Table S1.** Results of the prediction of the properties of polyethylene terephthalate (see Figure S1).

| Property name                                      | Abbreviation       | Value         | Units of measure                                          |
|----------------------------------------------------|--------------------|---------------|-----------------------------------------------------------|
| Connectivity index 0X                              | ${}^0\chi$         | 9.966255      |                                                           |
| Connectivity index 0Xv                             | ${}^0\chi^v$       | 7.356608      |                                                           |
| Connectivity index 1X                              | ${}^1\chi$         | 6.770857      |                                                           |
| Connectivity index 1Xv                             | ${}^1\chi^v$       | 4.215214      |                                                           |
| Repeat unit number of atoms                        | NAtoms             | 22            |                                                           |
| Repeat unit number of non-hydrogen atoms           | NNonH              | 14            |                                                           |
| Molweight PRU                                      | mw                 | 192.171120    | g/mole                                                    |
| Van-der-Waals Volume                               | $V_w$              | 95.043400     | cm <sup>3</sup> /mole                                     |
| Molar Volume                                       | V                  | 145.906844    | cm <sup>3</sup> /mole                                     |
| Polymer Molweight                                  | mw                 | 100000.000000 | g/mole                                                    |
| Density                                            | d                  | 1.317081      | g/cm <sup>3</sup>                                         |
| HeatCapacity(liquid)                               | $C_{(l)}$          | 311.476898    | J/mole/K                                                  |
| HeatCapacity(solid)                                | $C_{(s)}$          | 228.868423    | J/mole/K                                                  |
| Cohesion Energy Fedors                             | ECoh1              | 74086.000000  | J/mole                                                    |
| Cohesion Energy Van Krevelen                       | ECoh2              | 57031.144728  | J/mole                                                    |
| Solubility parameter Feudor                        | $\delta$           | 22.533582     | (J/cc) <sup>0.5</sup>                                     |
| Solubility parameter VanKrevelen                   | $\delta$           | 19.770525     | (J/cc) <sup>0.5</sup>                                     |
| Refractive Index                                   | nd                 | 1.555804      |                                                           |
| Molar Refractivity                                 | $R_{LL}$           | 46.886865     | cm <sup>3</sup> /mole                                     |
| Dielectric constant                                | $\epsilon$         | 3.282741      |                                                           |
| Molar Polarizability                               | $P_{LL}$           | 63.048247     | cm <sup>3</sup> /mole                                     |
| Effective dipole Moment                            | $\mu$              | 0.885737      | Debye                                                     |
| Glass temperature at molweight 100000.000000       | $T_g$              | 369.530916    | K                                                         |
| Infinite molweight Tg                              | $T_{ginf}$         | 368.160911    | K                                                         |
| Bulk modulus                                       | B                  | 4411.275179   | MPa                                                       |
| Young modulus                                      | E                  | 2594.893883   | MPa                                                       |
| Shear modulus                                      | G                  | 925.452316    | MPa                                                       |
| Entanglement Molweight                             | me                 | 5732.790343   | g/mole                                                    |
| Brittle fracture stress at infinite molweight      | $\sigma_f(\infty)$ | 112.761375    | Mpa                                                       |
| Brittle fracture stress at molweight 100000.000000 | $\sigma_f(\infty)$ | 90.782506     | Mpa                                                       |
| Yield stress                                       | $\sigma_y$         | 72.657029     | Mpa                                                       |
| PRU length (used)                                  | l                  | 7.189514      | A                                                         |
| Molar Rao function                                 | $U_R$              | 8568.091706   | cm <sup>10/3</sup> /(sec <sup>1/3</sup> mole)             |
| Molar Hartman function                             | $U_H$              | 6596.460723   | cm <sup>10/3</sup> /(sec <sup>1/3</sup> mole)             |
| Poisson ratio                                      | nu                 | 0.401960      |                                                           |
| Molar stiffness function                           | K                  | 80.936657     | g <sup>0.25</sup> cm <sup>1.5</sup> /mole <sup>0.75</sup> |
| Molar viscosity function                           | $H_\eta$           | 7001.243871   | g <sup>*</sup> J <sup>1/3</sup> *mole <sup>-4/3</sup>     |
| Activation energy viscous flow                     | $E_\eta$           | 48.357212     | kJ/mol                                                    |
| Thermal conductivity at 298K                       | $\lambda(298)$     | 0.209668      | J/(K*m*sec)                                               |
| Permeability of oxygen at 298K                     | P <sub>O2</sub>    | 0.039764      | Barrers                                                   |

| Property name                          | Abbreviation       | Value                     | Units of measure |
|----------------------------------------|--------------------|---------------------------|------------------|
| Permeability of nitrogen at 298K       | P <sub>N2</sub>    | 0.007916                  | Barrers          |
| Permeability of carbon dioxide at 298K | P <sub>CO2</sub>   | 0.137064                  | Barrers          |
| Permeability of water vapours at 298K  | P <sub>H2O</sub>   | 87.849412                 | Barrers          |
| Molar Thermal Decomposition function   | Y <sub>d,1/2</sub> | 140.650619                | K*kg/mol         |
| Temperature of half decomposition      | T <sub>d,1/2</sub> | 731.903000                | K                |
| Soluble in solvents                    |                    | Morpholine,<br>Cellosolve | Pyridine,        |
| Insoluble in solvents                  |                    | Ethylene glycol,<br>Water | Glycerol,        |

**Table S2.** Extreme values of the predicted physicochemical properties of polymers with various combinations of substituents and BiceranoDB polymers [11]. The explanation of property abbreviations is given in Table S1. MinID and MaxID are identifiers of structures in the ZeroTwo.zip database [53]. For properties, dependent on molecular weight, the molecular weight of the polymer was assumed to be 100,000.

| Property  | ZeroTwo structures (5,142,153) |          |        |          | Bicerano DB(811)       |        |
|-----------|--------------------------------|----------|--------|----------|------------------------|--------|
|           | Min.                           | Min.ID   | Max.   | Max. ID  | Min.                   | Max.   |
| CL        | 0.7959                         | A2706088 | 2.222  | A1571904 | 0.8735                 | 2.286  |
| CS        | 0.5638                         | A1193001 | 1.859  | A2695849 | 0.5344                 | 1.805  |
| COH1      | 161                            | A2774968 | 1321   | A3195731 | 160.9                  | 1321   |
| COH2      | 85.06                          | A2774968 | 1016   | A0722505 | 74.92                  | 982.9  |
| RLL       | 0.1108                         | A3195737 | 0.3527 | A2773598 | 0.1008                 | 0.3598 |
| PLL       | 0.1506                         | A0719754 | 0.5080 | A0614124 | 0.1189                 | 0.4673 |
| EAFLOW    | 0.04.998                       | A2786776 | 3.666  | A1514456 | 0.03678                | 5.486  |
| STIFFNESS | 6.410                          | A2914202 | 228.4  | A1590739 | 10.38                  | 383.7  |
| EPSILON   | 2.126                          | A0719754 | 9.404  | A3195731 | 2.004                  | 9.404  |
| VISCFUNC  | 392.7                          | A2914202 | 37440  | A0023354 | 785.4                  | 37260  |
| DELTA1    | 13.30                          | A2695772 | 47.21  | A3195731 | 13.76                  | 47.21  |
| DELTA2    | 12.33                          | A2789072 | 38.23  | A0054943 | 12.55                  | 34.81  |
| N         | 1.338                          | A2774968 | 1.828  | A1979974 | 1.332                  | 1.828  |
| MU        | 0.000                          | A0283413 | 1.876  | A0000575 | 0.000                  | 1.990  |
| MB        | 379.9                          | A2257247 | 23550  | A3195731 | 529.3                  | 23550  |
| O2PERM    | $1.16 \times 10^{-14}$         | A3195731 | 129.7  | A2695845 | $1.16 \times 10^{-14}$ | 82.19  |
| N2PERM    | $2.27 \times 10^{-16}$         | A3195731 | 49.45  | A2695845 | $2.28 \times 10^{-16}$ | 30.22  |
| CO2PERM   | $3.05 \times 10^{-15}$         | A3195731 | 920.1  | A2695845 | $3.05 \times 10^{-15}$ | 560    |
| TDECOMP   | 451.8                          | A1210993 | 1162   | A2257316 | 484.5                  | 1098   |
| SINF      | 10.19                          | A2797603 | 652.3  | A3027335 | 7.625                  | 317.8  |
| SIGMAF    | $1.57 \times 10^{-5}$          | A0866414 | 629    | A3027335 | 0.6623                 | 301.6  |
| SIGMAY    | 3.179                          | A2257344 | 337.3  | A1194543 | 13.20                  | 302.9  |

**Table S3.** Chemical structures with extreme property values in the ZeroTwo database [53].

| Property name | Minimal value                                                                                | Maximal value                                                                                     |
|---------------|----------------------------------------------------------------------------------------------|---------------------------------------------------------------------------------------------------|
| CL<br>J/g/K   | 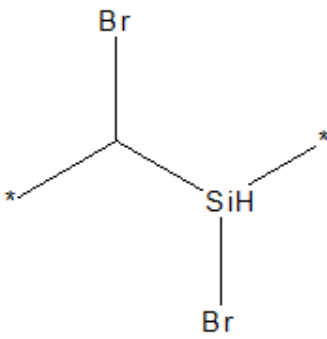<br>0.7959  | <br>2.222      |
| CS<br>J/g/K   | <br>0.5638  | <br>1.859      |
| COH1<br>J/g   | <br>161   | <br>1.321E+3 |
| COH2<br>J/g   | <br>85.06 | <br>1.016E+3 |

| Property name | Minimal value | Maximal value |
|---------------|---------------|---------------|
|---------------|---------------|---------------|

RLL  
cm<sup>3</sup>/g

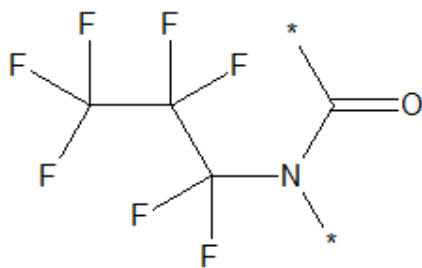

0.1108

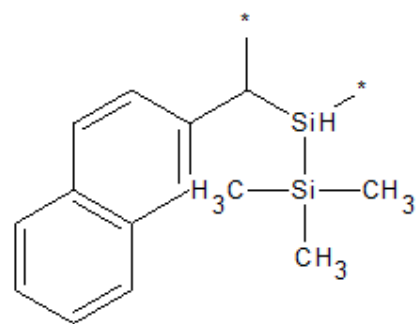

0.3527

PLL  
cm<sup>3</sup>/g

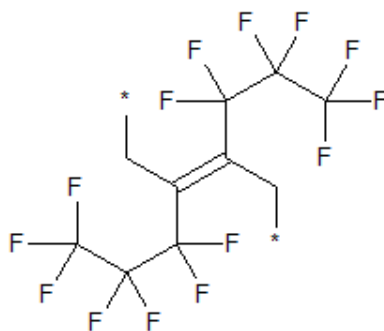

0.1506

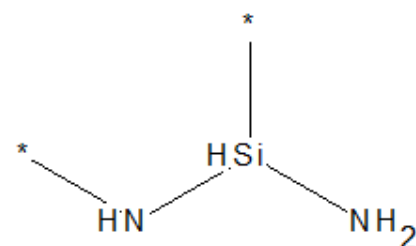

0.5080

EAFLOW  
kJ/g

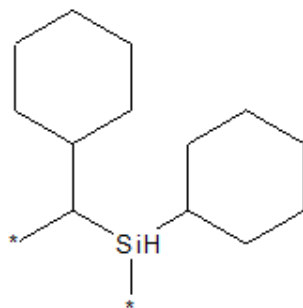

4.998E-2

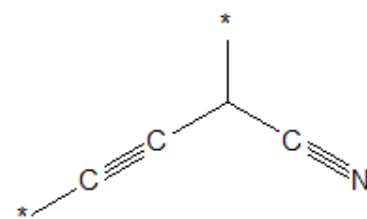

3.666

STIFFNESS  
g<sup>0.25</sup>cm<sup>1.5</sup>/mole<sup>0.75</sup>

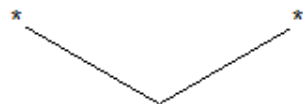

6.410

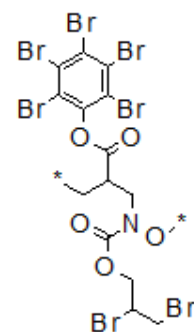

228.4



| Property name                       | Minimal value                                                                                | Maximal value                                                                                   |
|-------------------------------------|----------------------------------------------------------------------------------------------|-------------------------------------------------------------------------------------------------|
| EPSILON                             | 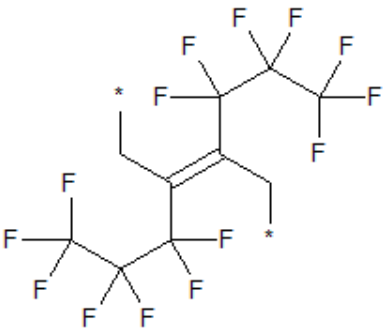<br>2.126   | <br>9.404    |
| VISCFUNC<br>$g^*J^{1/3}mole^{-4/3}$ | <br>392.7   | <br>3.744E+4 |
| DELTA1<br>$(J/cc)^{0.5}$            | <br>13.30 | <br>47.21  |
| DELTA2<br>$(J/cc)^{0.5}$            | <br>12.33 | <br>38.23  |

| Property name | Minimal value | Maximal value |
|---------------|---------------|---------------|
|---------------|---------------|---------------|

N

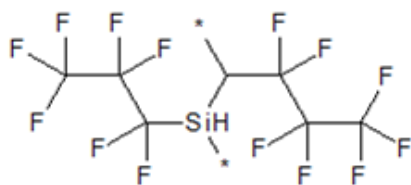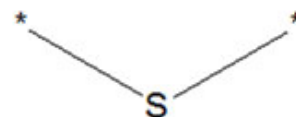

MU  
Debye

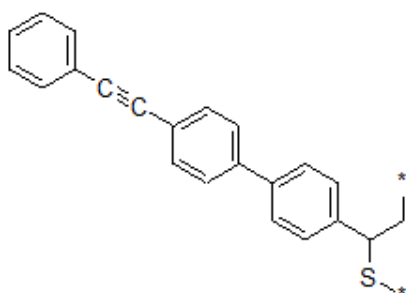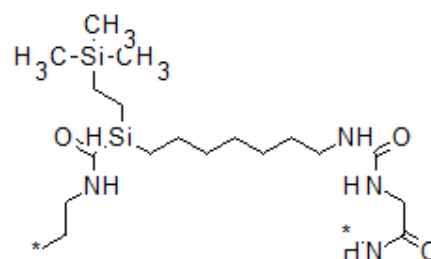

0.000

1.876

MB  
MPa

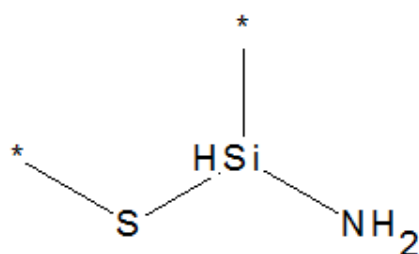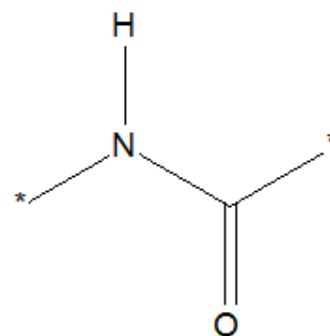

379.9

2.355E+4

O2PERM  
Barrers

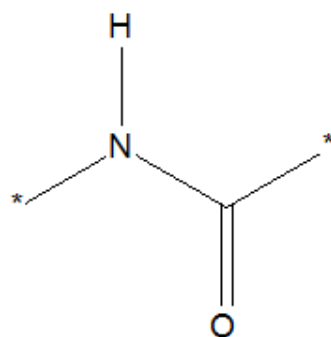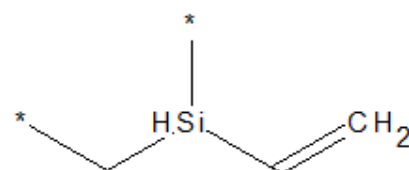

1.163E-14

129.7

| Property name      | Minimal value                                                                                  | Maximal value                                                                                     |
|--------------------|------------------------------------------------------------------------------------------------|---------------------------------------------------------------------------------------------------|
| N2PERM<br>Barrers  | 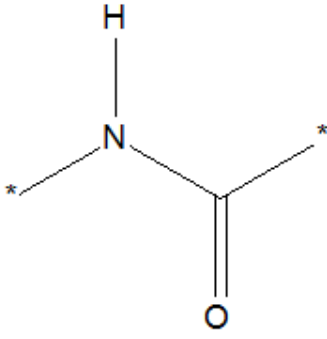<br>2.278E-16 | <br>49.45      |
| CO2PERM<br>Barrers | <br>3.050E-15 | <br>920.1      |
| TDECOMP<br>K       | <br>451.8   | <br>1.162E+3 |
| SINF<br>MPa        | <br>10.19   | <br>652.3    |

| Property name | Minimal value | Maximal value |
|---------------|---------------|---------------|
|---------------|---------------|---------------|

SIGMAF  
MPa

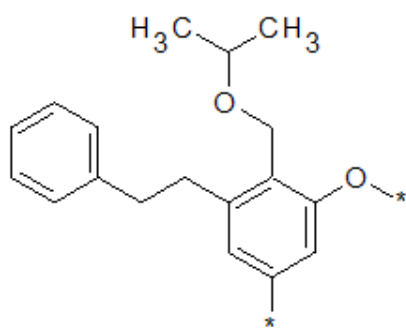

1.573E-5

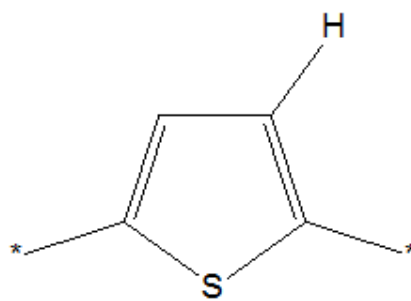

629

SIGMAY  
MPa

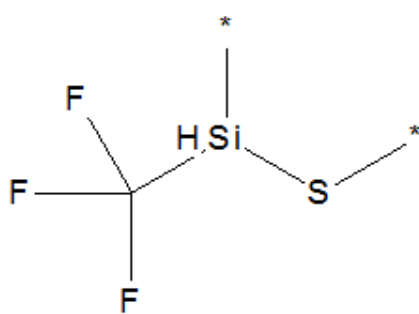

3.179

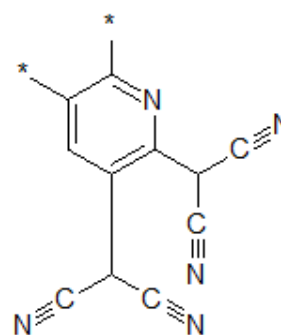

337.3

**Table S4 .** Chemical structures with extreme values of properties in the Bicerano database [11].

| Property name | Minimal value                                                                                | Maximal value                                                                                     |
|---------------|----------------------------------------------------------------------------------------------|---------------------------------------------------------------------------------------------------|
| CL<br>J/g/K   | 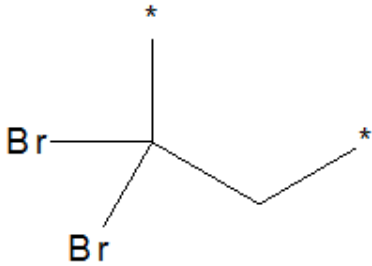<br>0.8735  | <br>2.286      |
| CS<br>J/g/K   | <br>0.5344  | <br>1.805     |
| COH1<br>J/g   | <br>160.9 | <br>1.321E+3 |
| COH2<br>J/g   | <br>74.92 | <br>982.9    |

| Property name                                                          | Minimal value                                                                                   | Maximal value                                                                                  |
|------------------------------------------------------------------------|-------------------------------------------------------------------------------------------------|------------------------------------------------------------------------------------------------|
| RLL<br>cm <sup>3</sup> /g                                              | 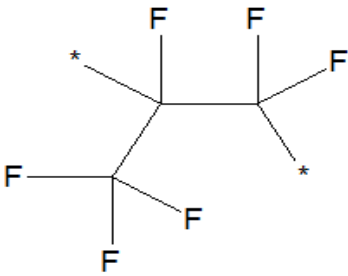<br>0.1008     | <br>0.3598  |
| PLL<br>cm <sup>3</sup> /g                                              | <br>0.1189     | <br>0.4673  |
| EAFLOW<br>kJ/g                                                         | <br>7.252E-2 | <br>5.486 |
| STIFFNESS<br>g <sup>0.25</sup> cm <sup>1.5</sup> /mole <sup>0.75</sup> | <br>10.38    | <br>223.7 |

| Property name                               | Minimal value                                                                                | Maximal value                                                                                   |
|---------------------------------------------|----------------------------------------------------------------------------------------------|-------------------------------------------------------------------------------------------------|
| EPSILON                                     | 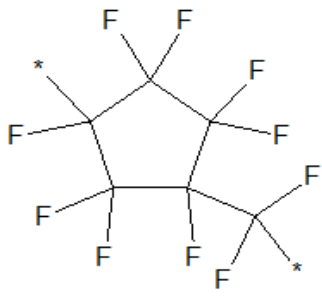<br>2.004   | <br>9.404    |
| VISCFUNC<br>$g^*J^{1/3} \text{mole}^{-4/3}$ | <br>785.4   | <br>2.964E+4 |
| DELTA1<br>$(J/cc)^{0.5}$                    | <br>13.76 | <br>47.21  |
| DELTA2<br>$(J/cc)^{0.5}$                    | <br>12.55 | <br>34.81  |

| Property name | Minimal value | Maximal value |
|---------------|---------------|---------------|
|---------------|---------------|---------------|

N

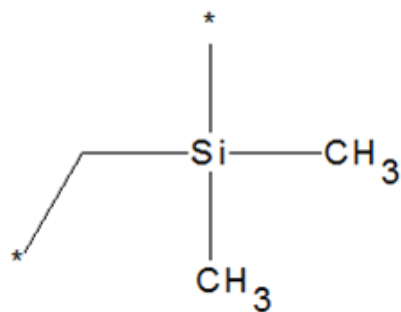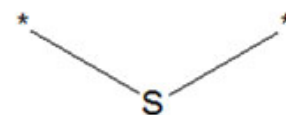

MU  
Debye

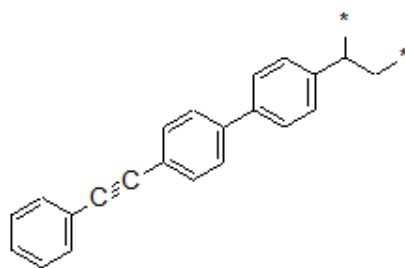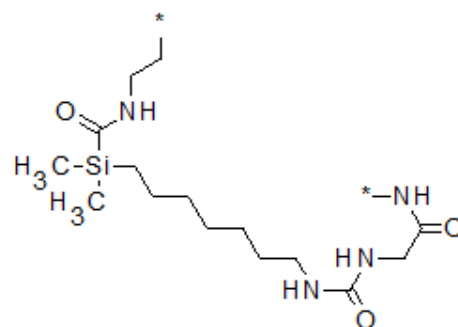

0.000

1.733

MB  
MPa

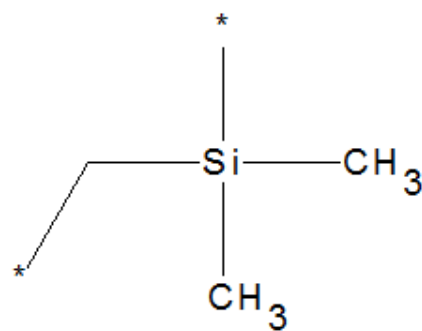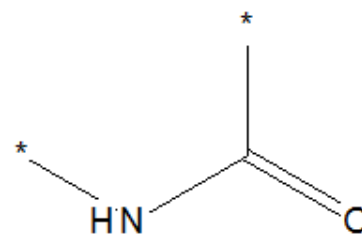

529.3

2.355E+4

O2PERM  
Barrers

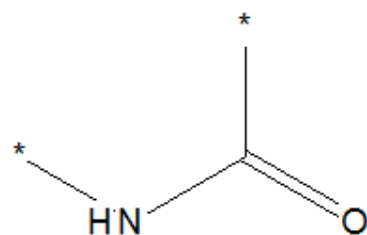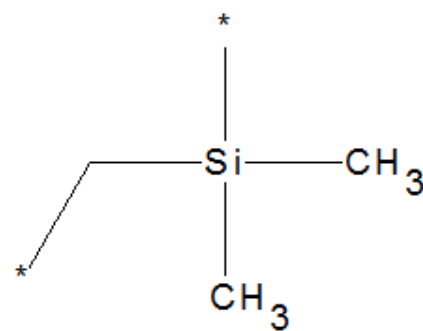

1.163E-14

82.19



| Property name | Minimal value | Maximal value |
|---------------|---------------|---------------|
|---------------|---------------|---------------|

N2PERM  
Barrers

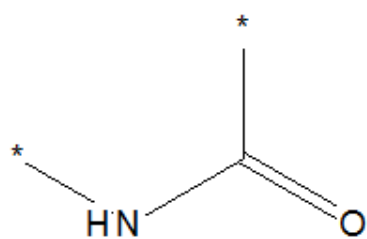

2.278E-16

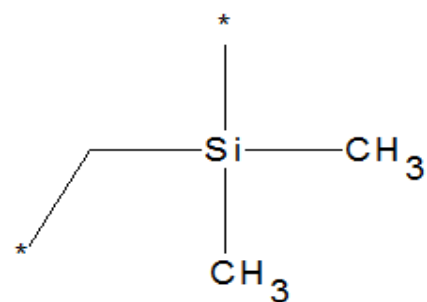

30.22

CO2PERM  
Barrers

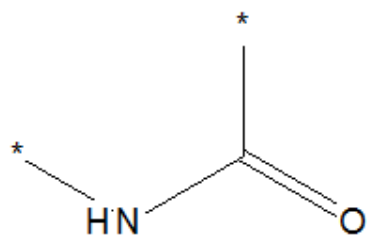

3.050E-15

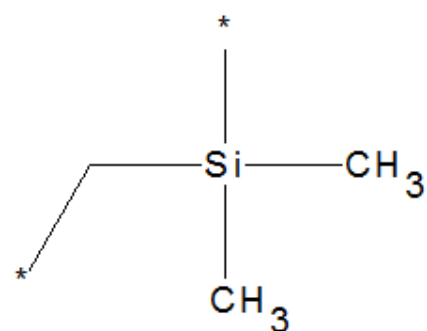

560

TDECOMP  
K

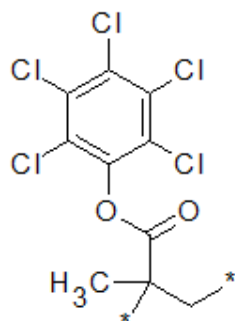

484.5

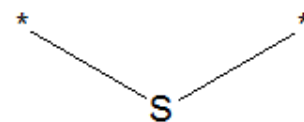

1.098E+3

SINF  
MPa

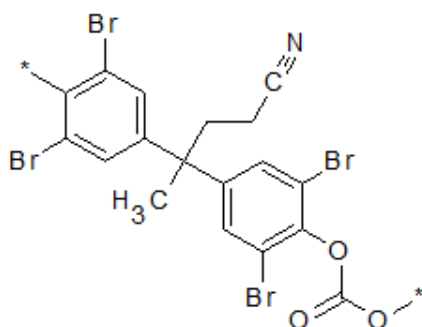

13.69

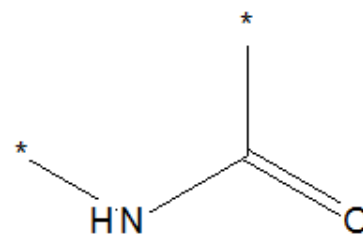

317.8

| Property name | Minimal value | Maximal value |
|---------------|---------------|---------------|
|---------------|---------------|---------------|

SIGMAF  
MPa

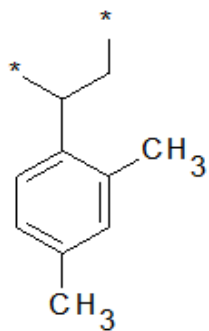

0.6623

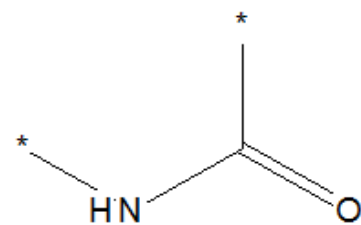

301.6

SIGMAY  
MPa

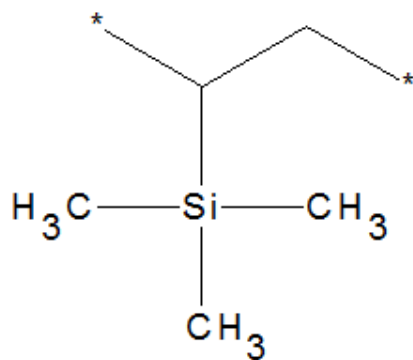

13.20

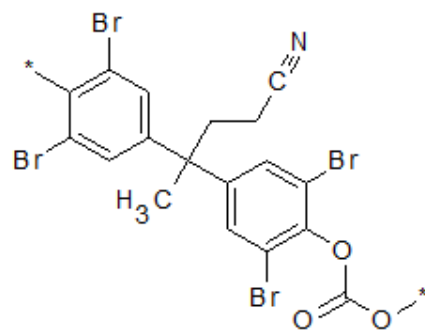

283.2

**Table S5** Extreme values of the predicted properties of compounds from the PI1M database [54] and the Monte Carlo database [53] (see our open-access file MonteCarloSmi.zip). For molecular weight-dependent properties, the molecular weight of the polymer was assumed to be 100,000. The abbreviated property names are listed in Table 1. Min.ID and Max.ID are identifiers of structures in the MonteCarloSmi.zip database [53].

| PI1M (787740 records) |                         |        | Monte Carlo (787740)    |         |        |         |
|-----------------------|-------------------------|--------|-------------------------|---------|--------|---------|
| Property name         | Min.                    | Max.   | Min                     | Min.ID  | Max    | MaxID   |
| CL                    | 0.8326                  | 2.320  | 0.7372                  | M462816 | 2.257  | M001119 |
| CS                    | 0.5292                  | 1.912  | 0.5450                  | M176330 | 1.956  | M378740 |
| COH1                  | 121.8                   | 1321   | 142.4                   | M386809 | 1321   | M158906 |
| COH2                  | 73.42                   | 1287   | 84.18                   | M085666 | 1296   | M417124 |
| RLL                   | 0.1008                  | 0.4047 | 0.1074                  | M028780 | 0.4158 | M321639 |
| PLL                   | 0.1122                  | 0.4923 | 0.1379                  | M028780 | 0.5319 | M081557 |
| EAFLOW                | 0.01369                 | 10.97  | 0.01655                 | M620408 | 10.97  | M296756 |
| STIFFNESS             | 4.725                   | 650.8  | 6.719                   | M097818 | 977.4  | M726398 |
| EPSILON               | 1.950                   | 9.404  | 2.110                   | M028780 | 9.404  | M001322 |
| VISCFUNC              | 750.8                   | 50200  | 781.6                   | M102345 | 177600 | M726398 |
| DELTA1                | 12.60                   | 47.21  | 12.60                   | M378740 | 47.21  | M158906 |
| DELTA2                | 10.07                   | 44.12  | 11.54                   | M117435 | 44.12  | M001722 |
| N                     | 1.320                   | 1.889  | 1.341                   | M028780 | 1.826  | M316810 |
| MU                    | 0.000                   | 2.999  | 0.000                   | M000046 | 4.086  | M503372 |
| MB                    | 277.6                   | 23550  | 207.3                   | M170848 | 23550  | M001322 |
| O2PERM                | $5.798 \times 10^{-15}$ | 458.7  | $5.798 \times 10^{-15}$ | M158906 | 461.2  | M075166 |
| N2PERM                | $1.074 \times 10^{-16}$ | 193.6  | $1.074 \times 10^{-16}$ | M158906 | 194.8  | M075166 |
| CO2PERM               | $1.429 \times 10^{-15}$ | 3644   | $1.429 \times 10^{-15}$ | M158906 | 3666   | M075166 |
| TDECOMP               | 363.7                   | 1266   | 368.9                   | M125581 | 1319   | M378740 |
| SINF                  | 2.664                   | 894.4  | 0.8548                  | M598491 | 2424   | M000121 |
| SIGMAF                | $4.055 \times 10^{-5}$  | 862.2  | $4.365 \times 10^{-3}$  | M014023 | 2339   | M000121 |
| SIGMAY                | 4.064                   | 719.5  | 0.2152                  | M075166 | 758.8  | M598491 |

**Table S6.** Chemical structures with extreme property values from the PI1M database [35].

| Property name | Minimal value                                                                                | Maximal value                                                                                     |
|---------------|----------------------------------------------------------------------------------------------|---------------------------------------------------------------------------------------------------|
| CL<br>J/g/K   | 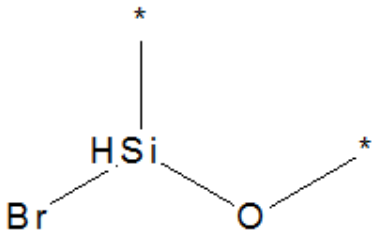<br>0.8326  | <br>2.320      |
| CS<br>J/g/K   | <br>0.5292 | <br>1.843     |
| COH1<br>J/g   | <br>145.4 | <br>1.321E+3 |

| Property name             | Minimal value                                                                                   | Maximal value                                                                                   |
|---------------------------|-------------------------------------------------------------------------------------------------|-------------------------------------------------------------------------------------------------|
| COH2<br>J/g               | 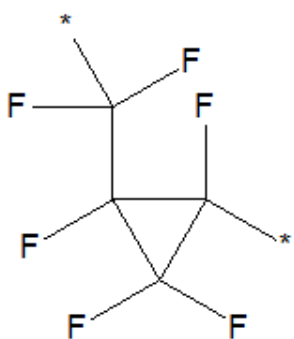<br>73.84      | <br>1.287E+3 |
| RLL<br>cm <sup>3</sup> /g | <br>0.1008    | <br>0.3881   |
| PLL<br>cm <sup>3</sup> /g | <br>0.1122   | <br>0.4857 |
| EAFLOW<br>kJ/g            | <br>2.851E-2 | <br>10.97  |

| Property name                                                                   | Minimal value                                                                                | Maximal value                                                                                     |
|---------------------------------------------------------------------------------|----------------------------------------------------------------------------------------------|---------------------------------------------------------------------------------------------------|
| STIFFNESS<br>$\text{g}^{0.25}\text{cm}^{1.5}/\text{mole}^{0.7}$<br><sub>5</sub> | 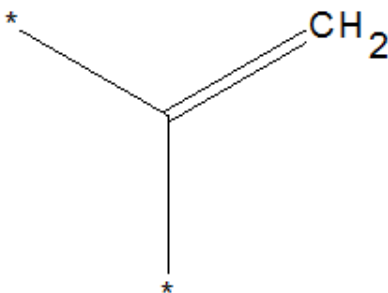<br>4.725   | <br>254.6      |
| EPSILON                                                                         | <br>1.950  | <br>9.404      |
| VISCFUNC<br>$\text{g}^* \text{J}^{1/3} \text{mole}^{-4/3}$                      | <br>750.8 | <br>2.891E+4 |
| DELTA1<br>$(\text{J/cc})^{0.5}$                                                 | <br>13.30 | <br>47.21    |

| Property name                   | Minimal value                                                                                | Maximal value                                                                                     |
|---------------------------------|----------------------------------------------------------------------------------------------|---------------------------------------------------------------------------------------------------|
| DELTA2<br>(J/cc) <sup>0.5</sup> | 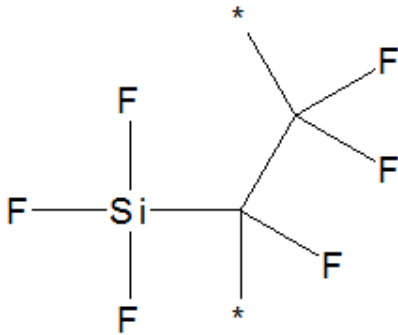<br>11.39   | <br>44.12      |
| N                               |            |                |
| MU<br>Debye                     | <br>0.000 | <br>1.997    |
| MB<br>MPa                       | <br>277.6 | <br>2.355E+4 |

| Property name      | Minimal value                                                                                                  | Maximal value                                                                                                                         |
|--------------------|----------------------------------------------------------------------------------------------------------------|---------------------------------------------------------------------------------------------------------------------------------------|
| O2PERM<br>Barrers  | 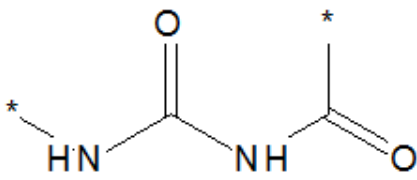<br><chem>*NC(=O)N*</chem>    | <br><chem>*C1=CC=C(C1Si(C)(C)Si(C)(C)C)O*</chem>   |
|                    | 5.798E-15                                                                                                      | 347.4                                                                                                                                 |
| N2PERM<br>Barrers  | <br><chem>*NC(=O)N*</chem>    | <br><chem>*C1=CC=C(C1Si(C)(C)Si(C)(C)C)O*</chem>   |
|                    | 1.074E-16                                                                                                      | 143.4                                                                                                                                 |
| CO2PERM<br>Barrers | <br><chem>*NC(=O)N*</chem>  | <br><chem>*C1=CC=C(C1Si(C)(C)Si(C)(C)C)O*</chem> |
|                    | 1.429E-15                                                                                                      | 2.692E+3                                                                                                                              |
| TDECOMP<br>K       | <br><chem>*c1ccncc1*</chem> | <br><chem>*C[Si](C)(C)[Si](C)(C)S*</chem>        |
|                    | 363.7                                                                                                          | 1.116E+3                                                                                                                              |



| Property name | Minimal value                                                                                     | Maximal value                                                                                      |
|---------------|---------------------------------------------------------------------------------------------------|----------------------------------------------------------------------------------------------------|
| SINF MPa      | 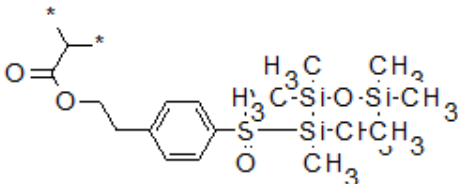 <p>7.082</p>    |  <p>894.4</p>   |
| SIGMAF MPa    |  <p>4.055E-5</p> |  <p>862.2</p>   |
| SIGMAY MPa    |  <p>4.139</p>  |  <p>673.4</p> |

**Table S7.** Chemical structures with extreme property values in the MonteCarlo database.

| Property name | Minimal value | Maximal value   |
|---------------|---------------|-----------------|
| CL<br>J/g/K   | <p>0.8326</p> | <p>2.257</p>    |
| CS<br>J/g/K   | <p>0.5450</p> | <p>1.830</p>    |
| COH1<br>J/g   | <p>165.3</p>  | <p>1.321E+3</p> |

| Property name             | Minimal value                                                                                   | Maximal value                                                                                   |
|---------------------------|-------------------------------------------------------------------------------------------------|-------------------------------------------------------------------------------------------------|
| COH2<br>J/g               | 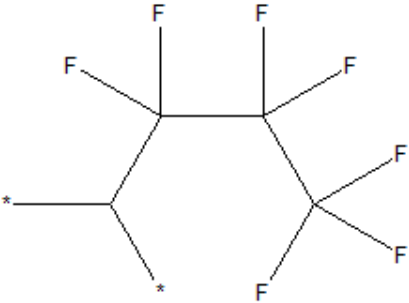<br>86.02      | <br>1.296E+3 |
| RLL<br>cm <sup>3</sup> /g | <br>0.1074    | <br>0.3486   |
| PLL<br>cm <sup>3</sup> /g | <br>0.1379   | <br>0.4842 |
| EAFLOW<br>kJ/g            | <br>4.597E-2 | <br>10.97  |

| Property name                                                                   | Minimal value                                                                                                                           | Maximal value                                                                                                                                             |
|---------------------------------------------------------------------------------|-----------------------------------------------------------------------------------------------------------------------------------------|-----------------------------------------------------------------------------------------------------------------------------------------------------------|
| STIFFNESS<br>$\text{g}^{0.25}\text{cm}^{1.5}/\text{mole}^{0.7}$<br><sub>5</sub> | 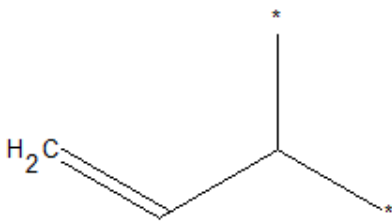<br><chem>C=C(C)C</chem>                               | <br><chem>CCCCNC(CCC)C[Si](C)(C)COC(=O)c1cc(Br)c(Br)c(Br)c1Br</chem>   |
|                                                                                 | 6.719                                                                                                                                   | 226.3                                                                                                                                                     |
| EPSILON                                                                         | <br><chem>C1(C(F)(F)F)C(F)(F)F(C(F)(F)F)C1(F)F</chem> | <br><chem>CC(C)N</chem>                                                |
|                                                                                 | 2.110                                                                                                                                   | 9.404                                                                                                                                                     |
| VISCFUNC<br>$\text{g}^* \text{J}^{1/3} \text{mole}^{-4/3}$                      | <br><chem>CCCC</chem>                                | <br><chem>CCCCNC(CCC)C[Si](C)(C)COC(=O)c1cc(Br)c(Br)c(Br)c1Br</chem> |
|                                                                                 | 785.4                                                                                                                                   | 3.744E+4                                                                                                                                                  |
| DELTA1<br>$(\text{J/cc})^{0.5}$                                                 | <br><chem>C[Si](C)(C)C[Si](C)(C)C</chem>             | <br><chem>NC(=O)NC(=O)N</chem>                                       |
|                                                                                 | 13.80                                                                                                                                   | 47.21                                                                                                                                                     |

| Property name                   | Minimal value                                                                                | Maximal value                                                                                     |
|---------------------------------|----------------------------------------------------------------------------------------------|---------------------------------------------------------------------------------------------------|
| DELTA2<br>(J/cc) <sup>0.5</sup> | 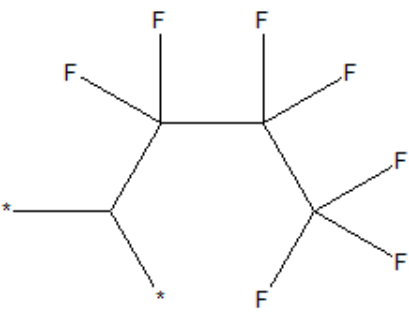<br>12.98   | <br>44.12      |
| N                               |            |                |
| MU<br>Debye                     | <br>0.000 | <br>1.964    |
| MB<br>MPa                       | <br>207.3 | <br>2.355E+4 |

| Property name      | Minimal value                                                                                    | Maximal value                                                                                     |
|--------------------|--------------------------------------------------------------------------------------------------|---------------------------------------------------------------------------------------------------|
| O2PERM<br>Barrers  | 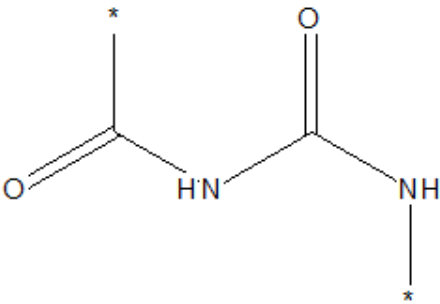<br>5.798E-15   | <br>90.05      |
| N2PERM<br>Barrers  | <br>1.074E-16  | <br>33.35     |
| CO2PERM<br>Barrers | <br>1.429E-15 | <br>618.6    |
| TDECOMP<br>K       | <br>368.9     | <br>1.155E+3 |

| Property name | Minimal value                                                                                      | Maximal value                                                                                       |
|---------------|----------------------------------------------------------------------------------------------------|-----------------------------------------------------------------------------------------------------|
| SINF MPa      | 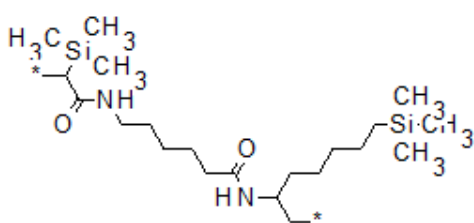 <p>6.548</p>     |  <p>2.424E+3</p> |
| SIGMAF MPa    |  <p>4.365E-3</p> |  <p>2.339E+3</p> |
| SIGMAY MPa    |  <p>4.248</p>   |  <p>620.1</p>  |

**Table S8.** Chemist-selected chemical structures with extreme property values from the MonteCarloAll database [53].

| Structure                                                                           | Extremal properties                                                   | Structure                                                                            | Extremal properties                                                                                                                                                                   |
|-------------------------------------------------------------------------------------|-----------------------------------------------------------------------|--------------------------------------------------------------------------------------|---------------------------------------------------------------------------------------------------------------------------------------------------------------------------------------|
| 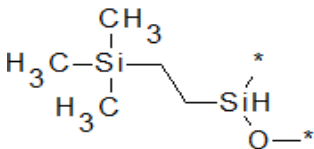   | DELTA1: 14.5543<br>(J/cc) <sup>0.5</sup>                              |    | DELTA1: 14.6953<br>(J/cc) <sup>0.5</sup>                                                                                                                                              |
|    | DELTA1: 14.7047<br>(J/cc) <sup>0.5</sup><br>O2PERM: 67.975<br>Barrers |    | DELTA1: 14.8919<br>(J/cc) <sup>0.5</sup><br>O2PERM: 46.216<br>Barrers                                                                                                                 |
|    | DELTA1: 14.9043<br>(J/cc) <sup>0.5</sup><br>D: 0.82716                |    | DELTA1: 14.9186<br>(J/cc) <sup>0.5</sup>                                                                                                                                              |
|  | DELTA1: 14.995<br>(J/cc) <sup>0.5</sup>                               |  | DELTA1: 36.584<br>(J/cc) <sup>0.5</sup><br>DELTA2: 37.171<br>(J/cc) <sup>0.5</sup><br>D: 2.50975<br>EPSILON: 8.095<br>H2OPERM: 5.030530E+0014<br>Barrers<br>SIGMAFINF: 1104.55<br>MPa |
|  | DELTA2: 13.2832<br>(J/cc) <sup>0.5</sup>                              |  | DELTA2: 13.52<br>(J/cc) <sup>0.5</sup>                                                                                                                                                |
|  | DELTA2: 13.7036<br>(J/cc) <sup>0.5</sup>                              |  | DELTA2: 44.125<br>(J/cc) <sup>0.5</sup><br>MB: 17918.3 MPa<br>O2PERM: 0.00000000077548<br>Barrers                                                                                     |



| Structure                                                                           | Extremal properties     | Structure                                                                            | Extremal properties     |
|-------------------------------------------------------------------------------------|-------------------------|--------------------------------------------------------------------------------------|-------------------------|
| 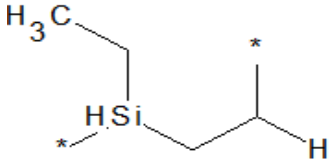   | D: 0.81959              |    | D: 0.82351              |
|    | D: 2.26062              |    | D: 2.26815              |
|    | D: 2.274                |    | EPSILON: 2.12568        |
|  | EPSILON: 2.13343        |  | EPSILON: 2.13435        |
|  | EPSILON: 9.4044         |  | EAFLOW: 8.0184<br>kJ/g  |
|  | EAFLOW: 10.5304<br>kJ/g |  | EAFLOW: 10.8874<br>kJ/g |

| Structure                                                                           | Extremal properties             | Structure                                                                            | Extremal properties               |
|-------------------------------------------------------------------------------------|---------------------------------|--------------------------------------------------------------------------------------|-----------------------------------|
| 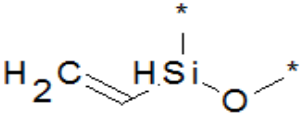   | EAFLOW: 10.9374<br>kJ/g         |    | EAFLOW: 308.442<br>kJ/g           |
|    | EAFLOW: 367.45<br>kJ/g          |    | EAFLOW: 505.3 kJ/g                |
|    | H2OPERM: 0.682<br>TGINF: 779.43 |    | H2OPERM: 2.4303                   |
|  | H2OPERM: 3.407050E+0015         |  | H2OPERM: 2.91E+0016<br>N: 1.79762 |
|  | HEATCOND: 0.115001              |  | HEATCOND: 0.115058                |
|  | HEATCOND: 0.250229              |  | HEATCOND: 0.263205                |

| Structure                                                                           | Extremal properties                             | Structure                                                                            | Extremal properties    |
|-------------------------------------------------------------------------------------|-------------------------------------------------|--------------------------------------------------------------------------------------|------------------------|
| 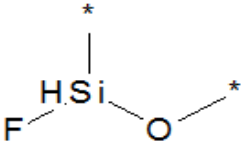   | MB: 558.62 MPa<br>O2PERM: 61.211 Barrers        |    | MB: 614.12 MPa         |
|    | MB: 14023.9 MPa<br>O2PERM: 0.0000000028 Barrers |    | O2PERM: 33.611 Barrers |
|    | O2PERM: 37.476 Barrers                          |    | O2PERM: 49.751 Barrers |
|   | N: 1.35309                                      |  | N: 1.35751             |
|  | N: 1.36293                                      |  | N: 1.74704             |
|  | N: 1.74928<br>SIGMAFINF: 569.56 MPa             |  | N: 1.78785             |

| Structure                                                                           | Extremal properties    | Structure                                                                            | Extremal properties   |
|-------------------------------------------------------------------------------------|------------------------|--------------------------------------------------------------------------------------|-----------------------|
| 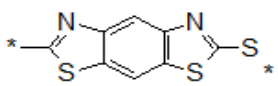   | N: 1.8255              |    | SIGMAFINF: 552.31 MPa |
|    | SIGMAFINF: 1380.62 MPa |    | TDECOMP: 368.88 K     |
|    | TDECOMP: 387.81 K      |    | TDECOMP: 438.03 K     |
|  | TDECOMP: 447.15 K      |  | TDECOMP: 934.69 K     |
|  | TDECOMP: 938.09 K      |  | TDECOMP: 938.87 K     |
|  | TDECOMP: 940.57 K      |  | TDECOMP: 964.43 K     |

| Structure                                                                           | Extremal properties                                    | Structure                                                                            | Extremal properties                                                                                                                      |
|-------------------------------------------------------------------------------------|--------------------------------------------------------|--------------------------------------------------------------------------------------|------------------------------------------------------------------------------------------------------------------------------------------|
| 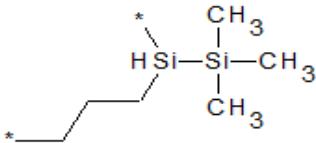   | TDECOMP: 973.79 K                                      |    | TDECOMP: 978.24 K                                                                                                                        |
|    | TDECOMP: 978.65 K                                      |    | TDECOMP: 986.48 K                                                                                                                        |
|    | TGINF: 721.3                                           |                                                                                      |                                                                                                                                          |
|  | TGINF: 791.88                                          |  | TGINF: 792.82                                                                                                                            |
|  | TGINF: 838.88                                          |  | DELTA1: 37.309<br>(J/cc) <sup>0.5</sup><br>DELTA2: 41.32<br>(J/cc) <sup>0.5</sup><br>MB: 15329 MPa<br>O2PERM: 0.0000000146236<br>Barrers |
|  | DELTA2: 14.3563<br>(J/cc) <sup>0.5</sup><br>N: 1.36901 |  | D: 0.84554                                                                                                                               |

| Structure                                                                           | Extremal properties                              | Structure                                                                            | Extremal properties                         |
|-------------------------------------------------------------------------------------|--------------------------------------------------|--------------------------------------------------------------------------------------|---------------------------------------------|
| 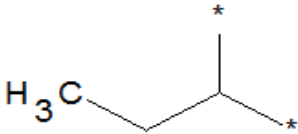   | D: 0.8457                                        |    | EPSILON: 2.16868<br>EAFLOW: 13.4684<br>kJ/g |
|    | EAFLOW: 14.5363<br>kJ/g                          |    | EAFLOW: 14.5363<br>kJ/g                     |
|    | H2OPERM: 1.75037<br>Barrers<br>TDECOMP: 449.56 K |    | HEATCOND: 0.114502                          |
|  | HEATCOND: 0.115507                               |  | MB: 524.99 MPa                              |
|  | MB: 668.09 MPa                                   |  | TDECOMP: 934.36 K                           |
|  | TDECOMP: 938.09 K                                |  | TGINF: 721.22                               |

| Structure | Extremal properties | Structure | Extremal properties |
|-----------|---------------------|-----------|---------------------|
|-----------|---------------------|-----------|---------------------|

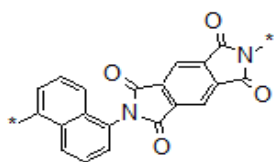

TGINF: 724.48

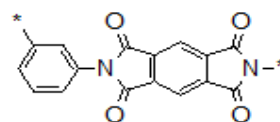

TGINF: 752.53

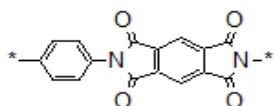

TGINF: 778.54

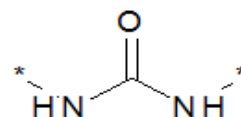

EPSILON: 7.8336

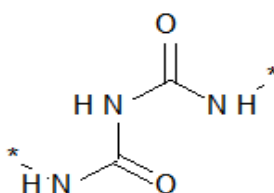

EPSILON: 8.042

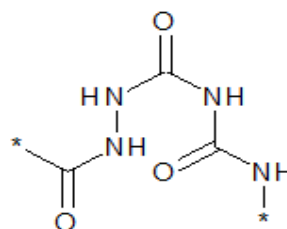

EPSILON: 8.1239
